1 **Unmasking cellular response of a bloom-forming alga to virus infection by**  
2 **resolving expression profiling at a single-cell level**

3 Shilo Rosenwasser<sup>1,5\*</sup>, Miguel J. Frada<sup>1,4</sup>, David Pilzer<sup>2</sup>, Ron Rotkopf<sup>3</sup> and Assaf Vardi<sup>1\*</sup>

4 <sup>1</sup>Department of Plant and Environmental Sciences, Weizmann Institute of Science, Rehovot,  
5 7610001, Israel

6 <sup>2</sup>Genomic Technologies Unit, Weizmann Institute of Science, Rehovot, 7610001, Israel.

7 <sup>3</sup>Bioinformatics and Biological Computing Unit, Weizmann Institute of Science, Rehovot, Israel.

8 <sup>4</sup>The Interuniversity Institute for Marine Sciences, Eilat, Israel & Department of Ecology,  
9 Evolution and Behavior, Silberman Institute of Life Sciences, The Hebrew University of  
10 Jerusalem, Israel

11 <sup>5</sup>Present address: The Robert H. Smith Institute of Plant Sciences and Genetics in Agriculture,  
12 The Hebrew University, Rehovot 7610001, Israel.

13 \*Corresponding author: [shilo.rosenwaser@mail.huji.ac.il](mailto:shilo.rosenwaser@mail.huji.ac.il), [assaf.vardi@weizmann.ac.il](mailto:assaf.vardi@weizmann.ac.il)

14 **Abstract:**

15 Marine viruses are major evolutionary and biogeochemical drivers of microbial life in the ocean.  
16 Host response to viral infection typically includes virus-induced rewiring of metabolic network  
17 to supply essential building blocks for viral assembly, as opposed to activation of anti-viral host  
18 defense. Nevertheless, there is a major bottleneck to accurately discern between viral hijacking  
19 strategies and host defense responses when averaging bulk population response. Here we use  
20 *Emiliania huxleyi*, a bloom-forming alga and its specific virus (EhV), as one of the most  
21 ecologically important host-virus model system in the ocean. Using automatic microfluidic setup  
22 to capture individual algal cells, we quantified host and virus gene expression on a single-cell  
23 resolution during the course of infection. We revealed high heterogeneity in viral gene  
24 expression among individual cells. Simultaneous measurements of expression profiles of host  
25 and virus genes at a single-cell level allowed mapping of infected cells into newly defined  
26 infection states and uncover a yet unrecognized early phase in host response that occurs prior to

27 viral expression. Intriguingly, resistant cells emerged during viral infection, showed unique  
28 expression profiles of metabolic genes which can provide the basis for discerning between viral  
29 resistant and sensitive cells within heterogeneous populations in the marine environment. We  
30 propose that resolving host-virus arms race at a single-cell level will provide important  
31 mechanistic insights into viral life cycles and will uncover host defense strategies.

32

### 33 **Introduction**

34 Marine viruses are recognized as major ecological and evolutionary drivers and have immense  
35 impact on the community structure and the flow of nutrients through marine microbial food webs  
36 [1-5]. The cosmopolitan coccolithophore *Emiliania huxleyi* (Prymnesiophyceae, Haptophyta) is a  
37 widespread unicellular eukaryotic alga, responsible for large oceanic blooms [6, 7]. Its intricate  
38 calcite exoskeleton accounts for ~1/3 of the total marine CaCO<sub>3</sub> production [8]. *E. huxleyi* is also  
39 a key producer of dimethyl sulfide [9], a bioactive gas with a significant climate-regulating role  
40 that seemingly enhances cloud formation [10]. Therefore, the fate of these blooms may have a  
41 critical impact on carbon and sulfur biogeochemical cycles. *E. huxleyi* spring blooms are  
42 frequently terminated as a consequence of infection by a specific large dsDNA virus (*E. huxleyi*  
43 virus, EhV) [11, 12]. The availability of genomic and transcriptomic data and a suite of host  
44 isolates with a range of susceptibilities to various EhV strains, makes the *E. huxleyi*-EhV a  
45 trackable host-pathogen model system with important ecological significance [13-20]}.

46 Recent studies demonstrated that viruses significantly alter the cellular metabolism of  
47 their host either by rewiring of host-encoded metabolic networks, or by introducing virus-  
48 encoded auxiliary metabolic genes (vAMG) which convert the infected host cell into an alternate  
49 cellular entity (the virocell [21]) with novel metabolic capabilities [22-27]. A combined  
50 transcriptomic and metabolomic approach taken during *E. huxleyi*-EhV interaction revealed  
51 major and rapid transcriptome remodeling targeted towards *de novo* fatty acid synthesis [18]  
52 fueled by glycolytic fluxes, to support viral assembly and the high demand for viral internal lipid  
53 membranes [28, 29]. Lipidomic analysis of infected *E. huxleyi* host and purified EhV virions  
54 further revealed a large fraction of highly saturated triacylglycerols (TAGs) that accumulated  
55 uniquely within distinct lipid droplets as a result of virus-induced lipid remodeling [27]. The  
56 EhV genome encodes for a unique vAMG pathway for sphingolipid biosynthesis, never detected

57 before in any other viral genome. Biochemical characterization of EhV-encoded serine  
58 palmitoyl-CoA transferase (SPT), a key enzyme in the sphingolipid biosynthetic pathway,  
59 revealed its unique substrate specificity which resulted in the production of virus-specific  
60 glycosphingolipids (vGSLs) composed of unusual hydroxylated C17 sphingoid-bases [30]. These  
61 viral-specific sphingolipids are essential for viral assembly and infectivity and can induce host  
62 programmed cell death (PCD) during the lytic phase of infection [14, 31]. Indeed, EhV can  
63 trigger hallmarks of PCD, including production of reactive oxygen species (ROS), induction of  
64 caspase activity, metacaspase expression, changes in ultrastructure features and compromised  
65 membrane integrity [32-34].

66 The high metabolic demand for building blocks required to support synthesis, replication  
67 and assembly of large viruses with high burst size as EhV [34-36], point to high dependence of  
68 viruses on their host metabolic state for optimal replication [21, 37]. Consequently, heterogeneity  
69 in host metabolic states as a result of complex interactions between nutrient availability and  
70 stress conditions may affect the infection dynamics. However, almost all of our current  
71 understanding of the molecular mechanisms that govern host-virus interactions in the ocean, is  
72 derived from experiments carried out at the population level, assuming synchrony and uniformity  
73 of the cell populations and neglecting any heterogeneity. Additionally, averaging the phenotypes  
74 of a whole population hinders the investigation of essential life cycle strategies to evade viral  
75 infection that can be induced only by rare subpopulations [38]. Understanding microbial  
76 interactions at a single-cell resolution is an emerging theme in microbiology. It enables the  
77 detection of complex heterogeneity within microbial populations and has been instrumental to  
78 identify novel strategies for acclimation to stress [39-41]. The recent advancement of sensitive  
79 technologies to detect gene expression from low input-RNA allows quantification of  
80 heterogeneity among cells by analyzing gene expression at the single cell level [42, 43]. High-  
81 throughput profiling of single-cell gene expression patterns in mammals and plant cells led to  
82 the discovery of new cell types, detection of rare cell subtypes, and provides better definition and  
83 cataloging of developmental phases in high resolution [44-48]. Importantly, the role of cell-to-  
84 cell communication and variability in controlling infection outcomes has only been recently  
85 demonstrated in cells of the mammalian immune system in response bacterial pathogens [49-52].  
86 Cell-to-cell variability in host response to viral infection was observed in several mammalian  
87 viruses and was attributed to several factors, including intrinsic noise (e.g. stochasticity of

88 biochemical interactions involved in the infection process), the number of viral genomes  
89 initiating the infection process and the specific cell-state before the infection [52-55].

90 Recently, simultaneous detection of host and pathogen gene expression profile was  
91 suggested as a powerful tool used to gain a better understanding of the molecular mechanisms  
92 underlying the infection process and to identify host resistance responses [21, 56-58]. However,  
93 the existence of cell-to-cell variability during infection suggest that key events in host response  
94 are masked by conventional bulk cell expression profiling and that detection of gene expression  
95 on single cell resolution may uncover hidden host responses.

96 Here, we quantified the dynamics of host and virus gene expression profiles of individual  
97 cells during infection of *E. huxleyi* populations. We provide strong evidence for heterogeneity  
98 within the population and discern between cells at different infection states based on their viral  
99 gene expression signatures. We unravel an unrecognized phase of early host response that  
100 preceded viral gene expression within infected cells. We suggest that examining host and virus  
101 gene expression profiles at the single cell resolution allows to infer the temporal dynamic of the  
102 infection process, thereby it serve as an attractive approach to decipher the molecular mechanism  
103 underlying host-virus interaction.

104

## 105 **Results and Discussion:**

106 To examine the variability within infected *E. huxleyi* cells, we measured the expression levels of  
107 selected host and viral genes over the course of infection at a single-cell resolution. Cells were  
108 isolated during infection of *E. huxleyi* CCMP2090 at different phases, at 0, 2, 4, 24 hours post  
109 infection (hpi) (Figure 1). We used the C1 single-cell Auto Prep System to sort and extract RNA  
110 from single *E. huxleyi* cells during viral infection by EhV201). The presence of a single cell  
111 captured in an individual isolation chamber was confirmed by microscopic inspection of emitted  
112 chlorophyll auto-fluorescence (Figure 2A). In order to detect variability in viral infection states,  
113 we conducted simultaneous measurements of expression profiles of host and virus genes at a  
114 single-cell level by using multiplexed qPCR. We selected viral genes encoding for sphingolipid  
115 biosynthesis as well as gene markers for early and late infection[18, 59]. Selected genes involved  
116 in host metabolic pathways were targeted based on previous reports which demonstrated their  
117 functional role during infection, including primary metabolism (glycolysis, fatty acid  
118 biosynthesis), sphingolipid and terpenoid metabolism, autophagy and antioxidant genes [18, 27,

119 33, 34]. In addition, we examined the expression of host genes associated with life cycle, meiosis  
120 and PCD [32] that exhibited induction during infection [60], (see Supplemental Table 1 for  
121 primers list).

122 To test for the sensitivity in detection of gene expression on a single cell level, we  
123 spiked-in, to each C1 well, a set of External RNA Controls Consortium (ERCC) molecules that  
124 span a wide range of RNA concentrations (from ~0.5 to ~100 molecules per well). We  
125 subsequently quantified their concentration using similar qPCR amplification setup as used for  
126 the host and virus genes. Pairwise correlation between spike concentrations and Et (Et=30-Ct)  
127 values obtained from the qPCR was >0.98 (Pearson correlation coefficient, p-value=  $4.2 \cdot 10^{-12}$ ,  
128 Figure 2B). We found a highly sensitive level of detection with 40% probability to detect an  
129 RNA spike that is at a level of 1 molecule per sample (Figure 2C), similar to the detection level  
130 reported for mammalian cells [61]. Mean expression of viral and host genes in all examined cells  
131 were found to be  $11.8 \pm 4.0$  and  $6.96 \pm 2.5$  (Et values  $\pm$  SD), respectively (Figure 2D).

132 We detected a high variability in viral expression profiles among individual cells within  
133 the same infected population. For example, heterogeneity in the expression levels of virus-  
134 encoded ceramide synthase (*vCerS*, EPVG\_00014), a key enzyme in sphingolipid biosynthesis  
135 [18, 30] was detected during early phase of infection (2 and 4 hpi of CCMP2090, Figure 3A).  
136 Similar results were obtained for the average expression of 10 viral genes (Figure 3B). At the  
137 onset of viral lytic phase (24 hpi), all of the examined cells showed high viral gene expression  
138 (Figure 3A&B), suggesting that viruses eventually infected all of the examined host cells.  
139 Nevertheless, we cannot exclude the existence of a rare subpopulation that did not express viral  
140 genes. Principal component analysis (PCA) of viral gene expression among individual host cells  
141 showed that infected cells are distributed across distinct states of viral expression levels (Figure  
142 3C). All viral genes had positive and similar coefficients for the PC1 component which captures  
143 >90% of the variability of viral gene expression and found to be highly correlated to the average  
144 viral infection level ( $r = 0.99$ , Pearson linear correlation). These results demonstrate that PC1  
145 reflected the intensity of viral infection. Accordingly, we used the score value of PC1 as an index  
146 for the level of expression of viral genes in each individual cell and termed it “infection index”.

147 We further realized that averaging host phenotypes over the course of infection might  
148 hinder our ability to observe the initial response of the host to viral infection and that single-cell  
149 analysis could significantly increase the resolution for sensitive detection of host response at this

150 early stage of infection. We therefore re-ordered infected cells based on their viral infection  
151 index (PC1), rather than the actual time of infection (i.e. hpi), resulting in “pseudotemporal”  
152 hierarchy of single cells. Intriguingly, we unmasked a fraction of cells that were exposed to the  
153 virus but did not exhibit any detectable expression of viral genes. These cells had similar  
154 infection index values as control cells, with PC1 values  $< -10$ . We found that 33/179 (17%) of  
155 infected cells of CCMP2090 were at this distinct “lag phase” of viral infection. These individual  
156 cells were analyzed for their respective host gene expression levels based on a sliding window  
157 approach as it is less sensitive to technical noise which often observed in single cell data. We  
158 also used a statistical model to test for genes that are differentially expressed at these early stages  
159 of viral infection. This model incorporates the two types of heterogeneity that usually appear in  
160 single cell data, namely, the percentage of cells expressing a gene in a given population (e.g. Et  
161 value  $> 0$ ) and the variability in expression levels in cells exhibiting positive expression values  
162 [62]. Up-regulation of several host genes in infected cells was detected prior to viral expression  
163 (Figure 4A-C and supplemental Table 3). An intriguing example is the *metacaspase-2* gene ( $p=$   
164 0.0000027) which was previously suggested to be induced and recruited during EhV lytic phase  
165 and activation of *E. huxleyi* PCD [32]. We also found early induction of triosephosphate  
166 isomerase (*TPI*,  $p=0.00063$ ) and phospholipid:diacylglycerol acyltransferase (*PDAT*,  $p = 0.0018$ )  
167 which are involved in glycolysis and TAG biosynthesis. In addition, genes involve in autophagy  
168 [34] and *de novo* sphingolipid biosynthesis [18, 30] were detected in this unique early phase of  
169 host response. Since all of these metabolic pathways were recently shown to be essential for EhV  
170 infection[14, 18, 20, 21, 27, 30, 31, 33, 34], early induction of these pathways may serve as an  
171 effective viral strategy to prime optimal infection. Alternatively, this phase of early host response  
172 prior to viral gene expression may represent a newly unrecognized phase of immediate host anti-  
173 viral defense response. At the late stages of infection (infection index  $>10$ ), we observed  
174 induction of several meiosis-related genes, including *HOP1* and *MND* and two *SPO11*  
175 homologues and *MYB* in CCMP2090 (Figure 4B). These results are in agreement with previous  
176 studies that suggested a phenotype switch of *E. huxleyi* to evade viral infection [38] and propose  
177 the induction of meiosis-related genes as part of transcriptomic reprogramming of during  
178 infection [60].

179 Further inspection of the PCA analysis showed the cells exhibiting low to moderate level  
180 of PC1 were highly variable in their PC2 level. Interestingly, we found a positive correlation ( $r =$

181 0.53) between PC2 and the expression level of viral RNA polymerase gene (EPVG\_00062)  
182 which was previously reported to be expressed at early-mid phases of infection [18, 59], while a  
183 negative correlation ( $r = -0.44$ ) was found for a viral gene (EPVG\_00010) that is known to be  
184 expressed at late phases of infection. Accordingly, cells with low PC2 levels expressed  
185 EPVG\_00010 and not EPVG\_00062, while cells with high PC2 values exhibited the opposite  
186 trend (Figure 5A and B).

187 To further characterize host gene expression during different phases of infection, we  
188 manually clustered CCMP2090 cells according to their infection index (PC1) and the expression  
189 of either early or late viral genes (PC2) (Figure 5C) and examined the expression of host  
190 metabolic genes in these clusters (Figure 5D). This analysis showed that induction of most of  
191 host metabolic genes occurred in cells that expressed predominantly late viral genes (Figure 5D,  
192 CL5,  $-10 < PC1 < 10$ ,  $PC2 > 5$ ) and in cells with moderate expression of viral genes (Figure 5D,  
193 CL6,  $10 < PC1 < 30$ ). Down-regulation of many host genes was found in cells exhibiting high viral  
194 expression (Figure 5D, CL7,  $PC1 > 30$ ), suggesting that these cells were at the final stages of  
195 infection.

196 In order to further characterize the link between optimal host metabolic state and  
197 efficient viral infection, we infected CCMP2090 stationary culture and subjected single cells to  
198 dual gene expression analysis at 2 hpi (Figure 6A). While most of the exponential growing cells  
199 exhibited viral expression, we detected only moderate viral expression in 3/27 (11%) of the  
200 stationary phase cells (Figure 6A), while the rest of the cells had viral expression patterns similar  
201 to uninfected cells (control). In parallel, stationary phase cells (either control or infected)  
202 exhibited down-regulation of most of the examined host metabolic genes, in contrast to their  
203 general up-regulation in infected exponential phase cells (Figure 6B). These data suggest that the  
204 cell-to-cell variability in host metabolic state may play important role in determining  
205 susceptibility to infection by large viruses with high metabolic demand. “Kill the Winner” is a  
206 key theory in microbial ecology which suggests that viruses shape diversity of microbial  
207 populations by infecting the most dominant proliferative host [63]. We propose that “Kill the  
208 Winner” may even act within isogenic populations based on the variability in the metabolic state,  
209 which will lead to differential susceptibility to viral infection, forming continuous host-virus co-  
210 existence [64]. It is possible that cell-to-cell heterogeneity in the metabolic activity is shaped by  
211 the tradeoff between complex abiotic stress conditions (e.g. nutrient availability [65-67] and light

212 regime) and biotic interactions (e.g. pathogenicity or allelopathy), and may result in differential  
213 susceptibility to viral infection in the marine environment.

214 We further investigated whether uninfected sensitive and resistant *E. huxleyi* cells  
215 exhibited altered expression profiles in the host metabolic genes that showed variable expression  
216 during infection (Table S4). We exposed *E. huxleyi* cultures to viral infection and isolated cells  
217 that acquired resistance to subsequent viral infection of diverse EhV isolates (Figure 7A, [60]).  
218 We compared the expression profiles of recovered resistant cells (n = 18) to their mother cells  
219 that were highly susceptible to viral infection (n = 76). The tendency of resistance cells to  
220 aggregate make it difficult to isolate single cells, therefore for these analysis also doublet cells  
221 were included. Intriguingly, resistant and sensitive cells tend to cluster distinctively along the  
222 PC2 dimension (Figure 7B). Among the genes that drive the separation along the PC2 dimension  
223 and were differentially expressed in resistant and sensitive cells were *TPI*, diphosphomevalonate  
224 decarboxylase (*MVD1*) and *ceramidase-3* (Figure 7C) which are key enzymes in glycolysis,  
225 terpenoid and sphingolipid metabolism, respectively. Since *de novo* ceramide biosynthesis is  
226 uniquely encoded in the EhV genome, activation of ceramidase may serve as an anti-viral host  
227 response [18, 30]. Interestingly resistant cells also exhibited high expression of *metacaspase2*  
228 which was also highly expressed in cells with no viral expression in early phase of infection  
229 (Figure 7C). This data suggests that susceptibility to viral infection has a clear signature in  
230 expression profiles of host genes detected on a single-cell level.

231 Although the mechanism for resistance of *E. huxleyi* to viral infection requires further  
232 investigations, the differential regulation of host metabolic genes suggests a unique specialized  
233 metabolism that differs from that of susceptible cells [68-70]. Future single-cell RNA-seq  
234 transcriptomic studies will provide high throughput identification of gene markers that are  
235 specific for resistant strains as well as new mechanistic insights into the molecular basis for  
236 resistance mechanisms.

237

## 238 **Conclusions**

239 The data presented here suggests detection of host and virus expression profiles on a  
240 single-cell level as a novel approach to characterized host responses during viral infection in high  
241 resolution which is commonly masked in whole population RNAseq approaches[71]. By  
242 applying dual gene expression profiling during algal host-virus interactions, we uncovered an



243 early host transcriptional responses. This newly defined phase can result from either induction of  
244 host resistance mechanism or derived from viral priming of host metabolic pathways. The new  
245 ability to define distinct “infection states” on a pseudo-temporal manner can potentially provide  
246 valuable information regarding the dynamics of active viral infection in “real time” also in the  
247 natural environment. Clustering of individual cells based on their specific transcriptomic  
248 signatures will uncover the relationship between host metabolic states and specific phenotypes  
249 associated with differential levels of viral infection or modes of resistance in natural populations.  
250 *In situ* quantification of the fraction of infected cells, their infection and metabolic states and the  
251 fraction of resistant cells will provide important insights into the infection dynamics and may  
252 provide fundamental understating of host-virus co-existence strategies in the ocean. Resolving  
253 host-virus interaction on a single cell will provide novel sensitive biomarkers to assess the  
254 ecological impact of marine viruses and their role in regulating the fate of algal blooms in the  
255 ocean.

## 256 **Methods**

### 257 Culture growth and viral infection dynamics

258 Cells of the non- calcified CCMP2090 and calcifying RCC1216 *E. huxleyi* strains were  
259 cultured in K/2 medium [72] and incubated at 18°C with a 16:8 h light-- dark illumination  
260 cycle. A light intensity of 100  $\mu\text{M photons}\cdot\text{m}^{-2}\cdot\text{s}^{-1}$  was provided by cool white LED lights.  
261 Experiments were performed with exponential phase ( $5\cdot 10^5$ - $1\cdot 10^6$  cells $\cdot\text{ml}^{-1}$ ) or stationary  
262 phase ( $5\cdot 10^6$  cells $\cdot\text{ml}^{-1}$ ) cultures. *E. huxleyi* virus EhV201 (lytic) used for this study was  
263 isolated originally in [12]. In CCMP2090 experiments, *E. huxleyi* was infected with a 1:50  
264 volumetric ratio of viral lysate to culture (multiplicity of infection (MOI) of about 1:1  
265 infectious viral particles per cell). In RCC1216 experiments,  
266 *E. huxleyi* was infected with a 1:1000 volumetric ratio of viral lysate to culture (MOI of about  
267 1:0.2 infectious viral particles per cell). For single-cell analysis, *E. huxleyi* cells were  
268 concentrated to  $2.5\cdot 10^6$  cells $\cdot\text{ml}^{-1}$  by gentle centrifugation (3000 RPM, 3 min) prior to single-  
269 cell isolation. To compare between viral infection in exponential and stationary phases,  
270 stationary phase cells were diluted to similar concentration of exponential phases cells using  
271 stationary conditioned medium ( $5\cdot 10^5$ - $1\cdot 10^6$  cells $\cdot\text{ml}^{-1}$ ) and then infected by EhV. The growth  
272 dynamics of *E. huxleyi* CCMP2090 strain and RCC1216 strain clones were monitored in  
273 seawater-based K/2 medium in control conditions and in the presence of the lytic viral strain  
274 EhV201. Resistant single cells were isolated after infection by mouth-pipetting over multiple  
275 passages through fresh medium under an inverted microscope. Single isolates were maintained  
276 in K/2 medium.

### 277 Enumeration of cell and virus abundance

278 Cells were monitored and quantified using a Multisizer 4 Coulter counter (Beckman Coulter,  
279 Nyon, Switzerland). For extracellular viral production, samples were filtered using 0.45  $\mu\text{M}$   
280 PVDF filters (Millex-HV, Millipore). Filtrate was fixed with a final concentration of 0.5%  
281 glutaraldehyde for 30 min at 4°C, then plunged into liquid nitrogen, and stored at -80°C until  
282 analysis. After thawing, 2:75 ratio of fixed sample was stained with SYBER gold (Invitrogen)  
283 prepared in Tris-EDTA buffer as instructed by the manufacturer (5  $\mu\text{l}$  SYBER gold in 50 mL  
284 Tris-EDTA), then incubated for 20 min at 80°C and cooled down to room temperature. Flow  
285 cytometric analysis was performed with excitation at 488 nm and emission at 525 nm.

### 286 Single-Cell Quantitative RT-PCR

287 Single cells were captured on a C1 STA microfluidic array (5-10  $\mu\text{m}$  cells) using the Fluidigm  
288 C1 and imaged on IX71S1F-3-5 motorized inverted Olympus microscope (Tokyo, Japan) to  
289 examine chlorophyll autofluorescence (ex:500/20 $\square$ nm, em:650 $\square$ nm LP). Only wells that  
290 exhibited chlorophyll autofluorescence signal emitted from single cells were further analyzed.  
291 External RNA Controls Consortium (ERCC) spikes were added to each well in a final dilution  
292 of 1:40,000. Cells were lysed and pre-amplified cDNA was generated from each cell using the  
293 Single Cells-to-CT Kit (Life Technologies). Pooled qPCR primers and Fluidigm STA reagents  
294 were added according to manufacturer's recommendations. Preamplified cDNA was then used  
295 for high-throughput qPCR measurement of each amplicon using a BioMark HD system.  
296 Briefly, a 2.7  $\mu\text{l}$  aliquot of each amplified cDNA was mixed with 3  $\mu\text{l}$  of 2X SsoFast  
297 EvaGreen Supermix with Low

300 ROX (Bio-Rad) and 0.3  $\mu\text{l}$  of 20X DNA Binding Dye Sample Loading Reagent (Fluidigm),  
301 and 5  $\mu\text{l}$  of each sample mix was then pipetted into one sample inlet in a

302 96.96 Dynamic Array IFC chip (Fluidigm). Individual qPCR primer pairs (50  $\mu$ M,  
303 Supplemental Table 1) in a 1.08  $\mu$ l volume were mixed with 3  $\mu$ l Assay Loading Reagent  
304 (Fluidigm) and 1.92  $\mu$ l Low TE, and 5  $\mu$ l of each mix was pipetted into one assay inlet in the  
305 same Dynamic Array IFC chip. Subsequent sample/assay loading was performed with an IFC  
306 Controller HX (Fluidigm) and qPCR was performed on the BioMark HD real-time PCR  
307 reader (Fluidigm) following manufacturer's instructions using standard fast cycling conditions  
308 and melt-curve analysis, generating an amplification curve for each gene of interest in each  
309 sample (cell). Data was analyzed using Real-time PCR Analysis software (Fluidigm) with the  
310 following settings: 0.65 curve quality threshold, linear derivative baseline correction,  
311 automatic thresholding by assay (gene), and manual melt curve exclusion. Cycle threshold  
312 (Ct) values for each reaction were exported. As seen in other applications of this  
313 technology [62], the data had a bimodal distribution with some cells ranging from 2.5 Ct to 30  
314 Ct, and another set of cells with Ct >40. Similar bimodal distribution was also observed for the  
315 ERCC spikes. Accordingly, we set the minimal threshold level of detection to 30 Ct and  
316 calculated expression threshold values (Et) by linear transformation of the data so that minimal  
317 Et was zero (30 Ct). For heat map visualization, expression data was normalized by  
318 subtracting the mean of each gene and dividing it with its standard deviation across cells.  
319 Single-cell PCR data was analyzed and displayed using MATLAB (MathWorks). Additional  
320 statistical analyses were performed using The SingleCellAssay R package [62]. Calculation of  
321 number of spike molecule per Fluidigm C1 well was performed according to [61].  
322  
323

324 **Acknowledgments:** We wish thank Dr. Daniella Schatz and Guy Schleyer from the Vardi lab,  
325 Dr. Roi Avraham from the Department of Biological Regulation at the Weizmann Institute of  
326 Science and Dr. Noam Stern-Ginossar from the Department of Molecular Genetics at the  
327 Weizmann Institute of Science for critical comments on the manuscript and fruitful discussion.  
328 We would also like to thank Tal Bigdary from the Design, Photography and Printing Branch at  
329 the Weizmann Institute of Science for assistance in designing the graphs for this manuscript.  
330 **Funding:** This research was supported by the European Research Council (ERC) StG  
331 (INFOTROPHIC grant no. 280991) and CoG (VIROCELLSPHERE grant no. 681715) awarded  
332 to A.V. **Competing interests:** The authors declare that they have no competing interests.  
333 **Author contributions:** S.R. and A.V. conceived and designed the experiments and wrote the  
334 manuscript. S.R., M.J.F and D.P conducted the single-cell experiments. R.R. performed single-  
335 cell statistical analysis. S.R analyzed the single-cell expression data.  
336  
337

### 337 **Figure legends:**

338 **Figure 1: Infection dynamics of *E. huxleyi* by its specific virus EhV.** *E. huxleyi* CCMP2090 culture was  
339 infected by the EhV201 lytic virus and compared with uninfected control cells. Host cell abundance and  
340 production of extracellular viruses were monitored using flow-cytometry. (mean  $\pm$  SD, n = 3, at least 6000 cells  
341 were measured at each time point).  
342

343 **Figure 2. Host and virus gene expression profiling at a single cell level.** (A) Automated microfluidic capture of a  
344 single *E. huxleyi* cell in the C1 chip (red: chlorophyll autofluorescence, indicated by a black arrow), the image on the  
345 right is a zoom into the image of a single cell. (B,C) Examination of detection level of single-cell gene expression  
346 analysis. A set of ERCC RNA molecules were spiked to each C1 well and their level was determined using  
347 multiplex qPCR. (B) The fraction of wells with positive qPCR reaction (Ct < 30) for each examined spike. (C) The  
348 correlation between the average level of expression (Et) value and the number of spike molecule. (D) Distribution of

349 host and virus genes expression among individual cells. The average expression values of host and viral genes  
350 among isolated single cells was calculated and the distribution is presented.

351  
352 **Figure 3. Single-cell analysis of infected population unmasks heterogeneity in viral gene expression profiles.**  
353 (A) Violin plots of the expression value (Et) of viral dihydroceramide synthase (vCerS, EPVG\_14, Gene bank:  
354 AET97902.1) at different hours post infection (hpi) of CCMP2090 cells infected by EhV201. (B) Violin plots of the  
355 mean expression value of 10 viral genes at different times post infection of CCMP2090 cells with EhV201. (C)  
356 Principal component analysis (PCA) plots of gene expression profiles of 10 viral genes derived from 323 individual  
357 *E. huxleyi* cells that were isolated from infected CCMP2090 cultures at different hpi.

358  
359 **Figure 4. Host-virus co-expression patterns across viral infection states.** Cells were re-ordered based on their  
360 infection index to reconstruct pseudotemporal separation of the infection process. (A, B) Clustogram representation  
361 of the average expression value of viral (A) and host (B) genes across the infection dynamics of CCMP2090 using a  
362 sliding window approach (window size = 20 cells). (C) Expression profile of selected host genes along the viral  
363 infection index (PC1) in the sliding windows of 20 cells reveals early induction of host genes prior to viral gene  
364 expression.

365  
366 **Figure 5. Viral expression is associated with induction of host metabolic genes at distinct phases of infection.**  
367 (A, B) The same PCA plots as in Figure 3C with overlay, by a color code, representing the expression level of viral  
368 genes (Et values) that are associated with early-mid (A) and late (B) phases of viral infection (EPVG\_00062 and  
369 EPVG\_00010, respectively). (C) The same PCA plots as in Figure 3C with overlay, by a color code, representing  
370 the different clusters. Cells were clustered manually based on their infection index (PC1) and PC2 scores. (D)  
371 Clustogram representation of the of expression values of 109 host metabolic genes in the different clusters (defined  
372 in A). (D) Clustogram representation of expression values of 109 host metabolic genes across the different clusters  
373 as defined in (C).

374  
375 **Figure 6. Low viral gene expression in culture at stationary phase is associated with down-regulation of host  
376 metabolic genes .** (A) Violin plots of the mean expression of viral genes in individual exponential and stationary  
377 cells at 2 hpi and in uninfected cells (Control). (B) Clustogram representation average expression values of 109 host  
378 metabolic genes in individual exponential and stationary cells at 2 hpi and in uninfected cells.

379  
380 **Figure 7. Differential expression of host gene on a single-cell level in virus-sensitive and virus-resistant cells.**  
381 (A) Virus-resistant cells were isolated from infected CCMP2090 cells. (B) PCA projection of gene expression  
382 profiles of 93 host metabolic genes in from 94 individual *E. huxleyi* cells that were isolated from the sensitive  
383 CCMP2090 and resistance CCMP2090 culture (CCMP2090-R). Duplet cells are visualized by slightly bigger  
384 dots.(C) Violin plots of selected host genes that highly contributed to the separation of cells along PC2. The  
385 SingleCellAssay R package [62] was used to test significant changes in gene expression and all presented genes had  
386  $p\text{-value} < 0.05$  of hurdle test (See supplementary Table 4).

387  
388  
389  
390  
391  
392  
393  
394  
395

## 396 **References:**

- 397 1. Bergh O, Borsheim KY, Bratbak G, Heldal M. High abundance of viruses found in aquatic environments.  
398 Nature. 1989;340(6233):467-8.  
399 2. Suttle CA. Marine viruses - major players in the global ecosystem. Nat Rev Micro. 2007;5(10):801-12.

- 400 3. Fuhrman JA. Marine viruses and their biogeochemical and ecological effects. *Nature*. 1999;399(6736):541-8.  
401 Epub 1999/06/22. doi: 10.1038/21119. PubMed PMID: 10376593.
- 402 4. Wilhelm SW, Suttle CA. Viruses and Nutrient Cycles in the Sea: Viruses play critical roles in the structure and  
403 function of aquatic food webs. *BioScience*. 1999;49(10):781-8. doi: 10.2307/1313569.
- 404 5. Weitz JS, Stock CA, Wilhelm SW, Bourouiba L, Coleman ML, Buchan A, et al. A multitrophic model to  
405 quantify the effects of marine viruses on microbial food webs and ecosystem processes. *ISME J*.  
406 2015;9(6):1352-64. doi: 10.1038/ismej.2014.220.
- 407 6. Holligan PM, Fernandez E, Aiken J, Balch WM, Boyd P, Burkill PH, et al. A biogeochemical study of the  
408 coccolithophore *Emiliana huxleyi*, in the North Atlantic. *Global Biogeochem Cy*. 1993;7:879-900.
- 409 7. Taylor AR, Brownlee C, Wheeler G. Coccolithophore cell biology: chalking up progress. *Annual review of*  
410 *marine science*. 2017;9:283-310. Epub 2016/11/05. doi: 10.1146/annurev-marine-122414-034032. PubMed  
411 PMID: 27814031.
- 412 8. Iglesias-Rodriguez D, Halloran PR, Rickaby REM, Hall IR, Colmenero-Hidalgo E, Gittins JR, et al.  
413 Phytoplankton calcification in a high-CO<sub>2</sub> world. *Science*. 2008;320:336-40.
- 414 9. Alcolombri U, Ben-Dor S, Feldmesser E, Levin Y, Tawfik DS, Vardi A. Identification of the algal dimethyl  
415 sulfide-releasing enzyme: A missing link in the marine sulfur cycle. *Science*. 2015;348(6242):1466-9. doi:  
416 10.1126/science.aab1586.
- 417 10. Simo R. Production of atmospheric sulfur by oceanic plankton: biogeochemical, ecological and  
418 evolutionary links. *Trends Ecol Evol*. 2001;16(6):287-94. Epub 2001/05/23. PubMed PMID: 11369106.
- 419 11. Bratbak G, Egge J, Heldal M. Viral mortality of the marine alga *Emiliana huxleyi* (Haptophyceae) and the  
420 termination of the algal bloom. *Mar Ecol Prog Ser*. 1993;93:39-48.
- 421 12. Schroeder DC, Oke J, Malin G, Wilson WH. Coccolithovirus (*Phycodnaviridae*): characterisation of a new  
422 large dsDNA algal virus that infects *Emiliana huxleyi*. *Arch Virol*. 2002;147:1685-98. Epub Published online  
423 July 19, 2002. doi: doi:10.1007/s00705-002-0841-3.
- 424 13. Read BA, Kegel J, Klute MJ, Kuo A, Lefebvre SC, Maumus F, et al. Pan genome of the phytoplankton  
425 *Emiliana* underpins its global distribution. *Nature*. 2013;499:209-13. Epub 2013/06/14. doi:  
426 10.1038/nature12221. PubMed PMID: 23760476.
- 427 14. Vardi A, Haramaty L, Van Mooy BA, Fredricks HF, Kimmance SA, Larsen A, et al. Host-virus dynamics  
428 and subcellular controls of cell fate in a natural coccolithophore population. *Proc Natl Acad Sci USA*.  
429 2012;109(47):19327-32. Epub 2012/11/09. doi: 10.1073/pnas.1208895109. PubMed PMID: 23134731; PubMed  
430 Central PMCID: PMC3511156.
- 431 15. Bidle KD, Vardi A. A chemical arms race at sea mediates algal host-virus interactions. *Curr Opin*  
432 *Microbiol*. 2011;14(4):449-57. doi: <http://dx.doi.org/10.1016/j.mib.2011.07.013>.
- 433 16. Wilson WH, Schroeder DC, Allen MJ, Holden MTG, Parkhill J, Barrell BG, et al. Complete genome  
434 sequence and lytic phase transcription profile of a *Coccolithovirus*. *Science*. 2005;309(5737):1090-2. doi:  
435 10.1126/science.1113109.
- 436 17. Feldmesser E, Rosenwasser S, Vardi A, Ben-Dor S. Improving transcriptome construction in non-model  
437 organisms: integrating manual and automated gene definition in *Emiliana huxleyi*. *BMC Genomics*.  
438 2014;15:148-63.
- 439 18. Rosenwasser S, Mausz MA, Schatz D, Sheyn U, Malitsky S, Aharoni A, et al. Rewiring host lipid  
440 metabolism by large viruses determines the fate of *emiliana huxleyi*, a bloom-forming alga in the ocean. *Plant*  
441 *Cell* 2014;26:2689-707. doi: 10.1105/tpc.114.125641.
- 442 19. Zhang X, Gamarra J, Castro S, Carrasco E, Hernandez A, Mock T, et al. Characterization of the small RNA  
443 transcriptome of the marine coccolithophorid, *Emiliana Huxleyi*. *PLOS ONE*. 2016;11(4):e0154279. doi:  
444 10.1371/journal.pone.0154279.
- 445 20. Schatz D, Rosenwasser S, Malitsky S, Wolf SG, Feldmesser E, Vardi A. Communication via extracellular  
446 vesicles enhances viral infection of a cosmopolitan alga. *Nature Microbiology*. 2017;2(11):1485-92. doi:  
447 10.1038/s41564-017-0024-3.
- 448 21. Rosenwasser S, Ziv C, Creveld SGv, Vardi A. Virocell Metabolism: Metabolic innovations during host-  
449 virus interactions in the ocean. *Trends Microbiol*. 2016;24:821-32. doi: 10.1016/j.tim.2016.06.006.
- 450 22. Ankrah NYD, May AL, Middleton JL, Jones DR, Hadden MK, Gooding JR, et al. Phage infection of an  
451 environmentally relevant marine bacterium alters host metabolism and lysate composition. *ISME J*.  
452 2014;8(5):1089-100. doi: 10.1038/ismej.2013.216.
- 453 23. Enav H, Mandel-Gutfreund Y, Beja O. Comparative metagenomic analyses reveal viral-induced shifts of  
454 host metabolism towards nucleotide biosynthesis. *Microbiome*. 2014;2(1):9. PubMed PMID: doi:10.1186/2049-  
455 2618-2-9.

- 456 24. Hurwitz BL, Hallam SJ, Sullivan MB. Metabolic reprogramming by viruses in the sunlit and dark ocean.  
457 Genome Biol. 2013;14(11):R123. doi: ARTN R123
- 458 10.1186/gb-2013-14-11-r123. PubMed PMID: WOS:000330616200002.
- 459 25. De Smet J, Zimmermann M, Kogadeeva M, Ceysens P-J, Vermaelen W, Blasdel B, et al. High coverage  
460 metabolomics analysis reveals phage-specific alterations to *Pseudomonas aeruginosa* physiology during  
461 infection. ISME J. 2016. doi: 10.1038/ismej.2016.3.
- 462 26. Thompson LR, Zeng Q, Kelly L, Huang KH, Singer AU, Stubbe J, et al. Phage auxiliary metabolic genes  
463 and the redirection of cyanobacterial host carbon metabolism. Proc Natl Acad Sci USA. 2011;108(39):E757-64.  
464 doi: 10.1073/pnas.1102164108. PubMed PMID: 21844365; PubMed Central PMCID: PMC3182688.
- 465 27. Malitsky S, Ziv C, Rosenwasser S, Zheng S, Schatz D, Porat Z, et al. Viral infection of the marine alga  
466 *Emiliania huxleyi* triggers lipidome remodeling and induces the production of highly saturated triacylglycerol.  
467 New Phytol. 2016;210(1):88-96. Epub 2016/02/10. doi: 10.1111/nph.13852. PubMed PMID: 26856244.
- 468 28. Lehahn Y, Koren I, Schatz D, Frada M, Sheyn U, Boss E, et al. Decoupling physical from biological  
469 processes to assess the impact of viruses on a mesoscale algal bloom. Curr Biol. 2014;24(17):2041-6. doi:  
470 <http://dx.doi.org/10.1016/j.cub.2014.07.046>.
- 471 29. Mackinder LC, Worthy CA, Biggi G, Hall M, Ryan KP, Varsani A, et al. A unicellular algal virus,  
472 *Emiliania huxleyi* virus 86, exploits an animal-like infection strategy. The Journal of general virology.  
473 2009;90(9):2306-16. Epub 2009/05/29. doi: 10.1099/vir.0.011635-0. PubMed PMID: 19474246.
- 474 30. Ziv C, Malitsky S, Othman A, Ben-Dor S, Wei Y, Zheng S, et al. Viral serine palmitoyltransferase induces  
475 metabolic switch in sphingolipid biosynthesis and is required for infection of a marine alga. Proc Natl Acad Sci  
476 USA. 2016;113: E1907–E16. Epub 2016/03/18. doi: 10.1073/pnas.1523168113. PubMed PMID: 26984500.
- 477 31. Vardi A, Van Mooy BA, Fredricks HF, Pendorf KJ, Ossolinski JE, Haramaty L, et al. Viral  
478 glycosphingolipids induce lytic infection and cell death in marine phytoplankton. Science. 2009;326(5954  
479 ):861-5. Epub 2009/11/07. doi: 10.1126/science.1177322. PubMed PMID: 19892986.
- 480 32. Bidle KD, Haramaty L, Barcelos e Ramos J, Falkowski P. Viral activation and recruitment of metacaspases  
481 in the unicellular coccolithophore, *Emiliania huxleyi*. Proc Natl Acad Sci USA. 2007;104(14):6049-54. doi:  
482 10.1073/pnas.0701240104.
- 483 33. Sheyn U, Rosenwasser S, Ben-Dor S, Porat Z, Vardi A. Modulation of host ROS metabolism is essential  
484 for viral infection of a bloom forming coccolithophore in the ocean. ISME J. 2016;10:1742–54. doi:  
485 10.1038/ismej.2015.228.
- 486 34. Schatz D, Shemi A, Rosenwasser S, Sabanay H, Wolf SG, Ben-Dor S, et al. Hijacking of an autophagy-like  
487 process is critical for the life cycle of a DNA virus infecting oceanic algal blooms. New Phytol.  
488 2014;204(4):854–63. doi: 10.1111/nph.13008.
- 489 35. Cheng Y-S, Labavitch J, VanderGheynst JS. Organic and inorganic nitrogen impact *Chlorella variabilis*  
490 productivity and host quality for viral production and cell lysis. Appl Biochem Biotechnol. 2015;176(2):467-79.  
491 doi: 10.1007/s12010-015-1588-0.
- 492 36. Colson P, De Lamballerie X, Yutin N, Asgari S, Bigot Y, Bideshi DK, et al. “Megavirales”, a proposed  
493 new order for eukaryotic nucleocytoplasmic large DNA viruses. Arch Virol. 2013;158(12):2517-21. doi:  
494 10.1007/s00705-013-1768-6.
- 495 37. Forterre P. To be or not to be alive: How recent discoveries challenge the traditional definitions of viruses  
496 and life. Studies in History and Philosophy of Science Part C: Studies in History and Philosophy of Biological  
497 and Biomedical Sciences. 2016;59:100-8. doi: <http://dx.doi.org/10.1016/j.shpsc.2016.02.013>.
- 498 38. Frada M, Probert I, Allen MJ, Wilson WH, de Vargas C. The “Cheshire Cat” escape strategy of the  
499 coccolithophore *Emiliania huxleyi* in response to viral infection. Proc Natl Acad Sci USA. 2008;105(41):15944-  
500 9. doi: 10.1073/pnas.0807707105.
- 501 39. Kashtan N, Roggensack SE, Rodrigue S, Thompson JW, Biller SJ, Coe A, et al. Single-Cell Genomics  
502 Reveals Hundreds of Coexisting Subpopulations in Wild *Prochlorococcus*. Science. 2014;344(6182):416-20.  
503 doi: 10.1126/science.1248575.
- 504 40. Yoon HS, Price DC, Stepanauskas R, Rajah VD, Sieracki ME, Wilson WH, et al. Single-cell genomics  
505 reveals organismal interactions in uncultivated marine protists. Science. 2011;332(6030):714-7. doi:  
506 10.1126/science.1203163.
- 507 41. Ackermann M. A functional perspective on phenotypic heterogeneity in microorganisms. Nature Reviews  
508 Microbiology. 2015;13:497. doi: 10.1038/nrmicro3491.
- 509 42. Liu S, Trapnell C. Single-cell transcriptome sequencing: recent advances and remaining challenges  
510 [version 1; referees: 2 approved]. F1000Research2016.

- 511 43. Guillaume-Gentil O, Grindberg RV, Kooger R, Dorwling-Carter L, Martinez V, Ossola D, et al. Tunable  
512 single-cell extraction for molecular analyses. *Cell*. 166(2):506-16. doi: 10.1016/j.cell.2016.06.025.
- 513 44. Tang F, Barbacioru C, Wang Y, Nordman E, Lee C, Xu N, et al. mRNA-Seq whole-transcriptome analysis  
514 of a single cell. *Nat Meth*. 2009;6(5):377-82. doi:  
515 [http://www.nature.com/nmeth/journal/v6/n5/suppinfo/nmeth.1315\\_S1.html](http://www.nature.com/nmeth/journal/v6/n5/suppinfo/nmeth.1315_S1.html).
- 516 45. Hashimshony T, Wagner F, Sher N, Yanai I. CEL-Seq: single-cell rna-seq by multiplexed linear  
517 amplification. *Cell Reports*. 2012;2(3):666-73. doi: <http://dx.doi.org/10.1016/j.celrep.2012.08.003>.
- 518 46. Grun D, Lyubimova A, Kester L, Wiebrands K, Basak O, Sasaki N, et al. Single-cell messenger RNA  
519 sequencing reveals rare intestinal cell types. *Nature*. 2015;525(7568):251-5. doi: 10.1038/nature14966  
520 <http://www.nature.com/nature/journal/v525/n7568/abs/nature14966.html#supplementary-information>.
- 521 47. Zeisel A, Muñoz-Manchado AB, Codeluppi S, Lönnerberg P, La Manno G, Juréus A, et al. Cell types in  
522 the mouse cortex and hippocampus revealed by single-cell RNA-seq. *Science*. 2015;347(6226):1138-42. doi:  
523 10.1126/science.aaa1934.
- 524 48. Efroni I, Mello A, Nawy T, Ip P-L, Rahni R, DelRose N, et al. Root regeneration triggers an embryo-like  
525 sequence guided by hormonal interactions. *Cell*. 2016;165(7):1721-33. doi:  
526 <http://dx.doi.org/10.1016/j.cell.2016.04.046>.
- 527 49. Avraham R, Haseley N, Brown D, Penaranda C, Jijon HB, Trombetta JJ, et al. Pathogen cell-to-cell  
528 variability drives heterogeneity in host immune responses. *Cell*. 163(2):523. doi: 10.1016/j.cell.2015.09.044.
- 529 50. Shalek AK, Satija R, Shuga J, Trombetta JJ, Gennert D, Lu D, et al. Single-cell RNA-seq reveals dynamic  
530 paracrine control of cellular variation. *Nature*. 2014;510(7505):363-9. doi: 10.1038/nature13437  
531 <http://www.nature.com/nature/journal/v510/n7505/abs/nature13437.html#supplementary-information>.
- 532 51. Saliba A-E, Li L, Westermann AJ, Appenzeller S, Stapels DAC, Schulte LN, et al. Single-cell RNA-seq  
533 ties macrophage polarization to growth rate of intracellular Salmonella. *Nature Microbiol*. 2016;2:16206. doi:  
534 10.1038/nmicrobiol.2016.206  
535 <http://www.nature.com/articles/nmicrobiol2016206#supplementary-information>.
- 536 52. Patil S, Fribourg M, Ge Y, Batish M, Tyagi S, Hayot F, et al. Single-cell analysis shows that paracrine  
537 signaling by first responder cells shapes the interferon- $\beta$  response to viral infection. *Sci Signal*.  
538 2015;8(363):ra16-ra. doi: 10.1126/scisignal.2005728.
- 539 53. Snijder B, Sacher R, Ramo P, Damm E-M, Liberali P, Pelkmans L. Population context determines cell-to-  
540 cell variability in endocytosis and virus infection. *Nature*. 2009;461(7263):520-3. doi:  
541 [http://www.nature.com/nature/journal/v461/n7263/suppinfo/nature08282\\_S1.html](http://www.nature.com/nature/journal/v461/n7263/suppinfo/nature08282_S1.html).
- 542 54. Heldt FS, Kupke SY, Dorl S, Reichl U, Frensing T. Single-cell analysis and stochastic modelling unveil  
543 large cell-to-cell variability in influenza A virus infection. *Nat Comm*. 2015;6:8938. doi: 10.1038/ncomms9938  
544 <http://www.nature.com/articles/ncomms9938#supplementary-information>.
- 545 55. Cohen EM, Kobiler O. Gene expression correlates with the number of herpes viral genomes initiating  
546 infection in single cells. *PLOS Pathog*. 2016;12(12):e1006082. doi: 10.1371/journal.ppat.1006082.
- 547 56. Westermann AJ, Gorski SA, Vogel J. Dual RNA-seq of pathogen and host. *Nat Rev Micro*.  
548 2012;10(9):618-30. doi: [http://www.nature.com/nrmicro/journal/v10/n9/suppinfo/nrmicro2852\\_S1.html](http://www.nature.com/nrmicro/journal/v10/n9/suppinfo/nrmicro2852_S1.html).
- 549 57. Rosani U, Varotto L, Domeneghetti S, Arcangeli G, Pallavicini A, Venier P. Dual analysis of host and  
550 pathogen transcriptomes in ostreid herpesvirus 1-positive Crassostrea gigas. *Environ Microbiol*  
551 2015;17(11):4200-12. doi: 10.1111/1462-2920.12706.
- 552 58. Nuss AM, Beckstette M, Pimenova M, Schmöhl C, Opitz W, Pisano F, et al. Tissue dual RNA-seq allows  
553 fast discovery of infection-specific functions and riboregulators shaping host-pathogen transcriptomes. *Proc*  
554 *Natl Acad Sci USA*. 2017;114(5):E791-E800. doi: 10.1073/pnas.1613405114.
- 555 59. Allen MJ, Forster T, Schroeder DC, Hall M, Roy D, Ghazal P, et al. Locus-specific gene expression pattern  
556 suggests a unique propagation strategy for a giant algal virus. *J Virol*. 2006;80(15):7699-705. doi:  
557 10.1128/jvi.00491-06.
- 558 60. Frada MJ, Rosenwasser S, Ben-Dor S, Shemi A, Sabanay H, Vardi A. Morphological switch and  
559 development of a resistant subpopulation in response to viral infection in a bloom-forming marine microalgae.  
560 2017.
- 561 61. Wu AR, Neff NF, Kalisky T, Dalerba P, Treutlein B, Rothenberg ME, et al. Quantitative assessment of  
562 single-cell RNA-sequencing methods. *Nat Meth*. 2014;11(1):41-6. doi: 10.1038/nmeth.2694  
563 <http://www.nature.com/nmeth/journal/v11/n1/abs/nmeth.2694.html#supplementary-information>.
- 564 62. McDavid A, Finak G, Chattopadhyay PK, Dominguez M, Lamoreaux L, Ma SS, et al. Data exploration,  
565 quality control and testing in single-cell qPCR-based gene expression experiments. *Bioinformatics*.  
566 2013;29(4):461-7. doi: 10.1093/bioinformatics/bts714.

- 567 63. Thingstad TF. Elements of a theory for the mechanisms controlling abundance, diversity, and  
568 biogeochemical role of lytic bacterial viruses in aquatic systems. *Limnol Oceanogr.* 2000;45(6):1320-8. doi:  
569 10.4319/lo.2000.45.6.1320.
- 570 64. Thyrrhaug R, Larsen A, Thingstad FT, Bratbak G. Stable coexistence in marine algal host-virus systems.  
571 *Mar Ecol Prog Ser.* 2003;254:27–35.
- 572 65. Schreiber F, Littmann S, Lavik G, Escrig S, Meibom A, Kuypers MMM, et al. Phenotypic heterogeneity  
573 driven by nutrient limitation promotes growth in fluctuating environments. *Nat Microbiol.* 2016;1:16055. doi:  
574 10.1038/nmicrobiol.2016.55  
575 <http://www.nature.com/articles/nmicrobiol201655#supplementary-information>.
- 576 66. Martínez JM, Schroeder DC, Larsen A, Bratbak G, Wilson WH. Molecular dynamics of *emiliana huxleyi*  
577 and cooccurring viruses during two separate mesocosm studies. *Appl Environ Microbiol.* 2007;73(2):554-62.  
578 doi: 10.1128/aem.00864-06.
- 579 67. Maat DS, Crawford KJ, Timmermans KR, Brussaard CPD. Elevated CO<sub>2</sub> and phosphate limitation favor  
580 *micromonas pusilla* through stimulated growth and reduced viral impact. *Appl Environ Microbiol.*  
581 2014;80(10):3119-27. doi: 10.1128/aem.03639-13.
- 582 68. Mausz MA, Pohnert G. Phenotypic diversity of diploid and haploid *Emiliana huxleyi* cells and of cells in  
583 different growth phases revealed by comparative metabolomics. *J Plant Physiol.* 2015;172:137-48. doi:  
584 <http://dx.doi.org/10.1016/j.jplph.2014.05.014>.
- 585 69. Hunter JE, Frada MJ, Fredricks HF, Vardi A, Van Mooy BAS. Targeted and untargeted lipidomics of  
586 *Emiliana huxleyi* viral infection and life cycle phases highlights molecular biomarkers of infection,  
587 susceptibility, and ploidy. *Front Mar Sci.* 2015;2(81). doi: 10.3389/fmars.2015.00081.
- 588 70. Yau S, Hemon C, Derelle E, Moreau H, Piganeau G, Grimsley N. A Viral immunity chromosome in the  
589 marine picoeukaryote, *Ostreococcus tauri*. *PLOS Pathog.* 2016;12(10):e1005965. Doi:  
590 10.1371/journal.ppat.1005965.
- 591 71. Westermann AJ, Barquist L, Vogel J. Resolving host–pathogen interactions by dual RNA-seq. *PLOS*  
592 *Pathogens.* 2017;13(2):e1006033. doi: 10.1371/journal.ppat.1006033.
- 593 72. Keller MD, Selvin RC, Claus W, Guillard RRL. Media for the culture of oceanic ultraphytoplankton. *J*  
594 *Phycol.* 1987;23(4):633-8. doi: 10.1111/j.1529-8817.1987.tb04217.x.



*E. huxleyi* cell abundance ( $10^6 \times \text{cells mL}^{-1}$ )

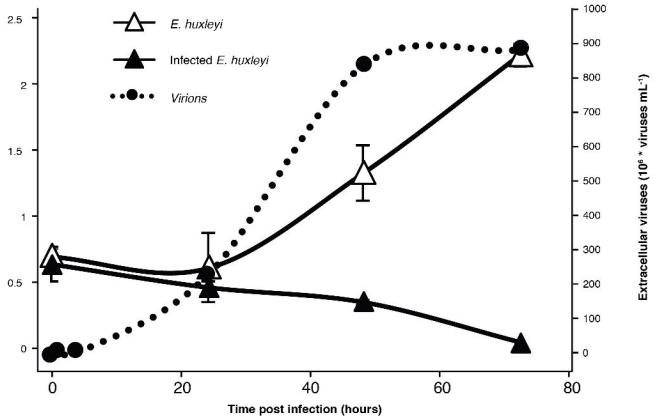

**A**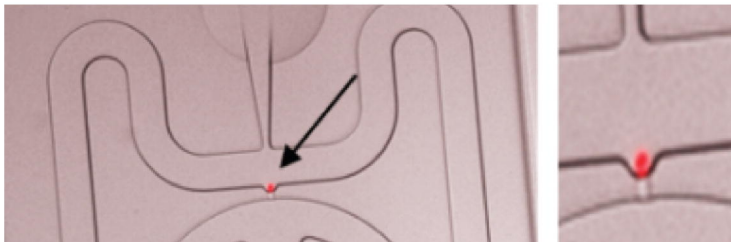**B**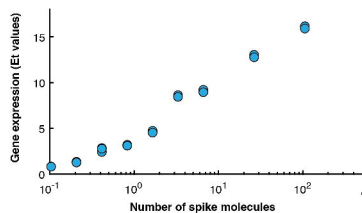**C**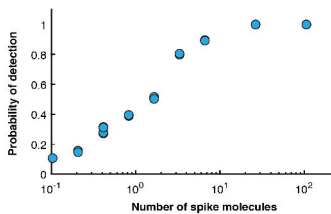**D**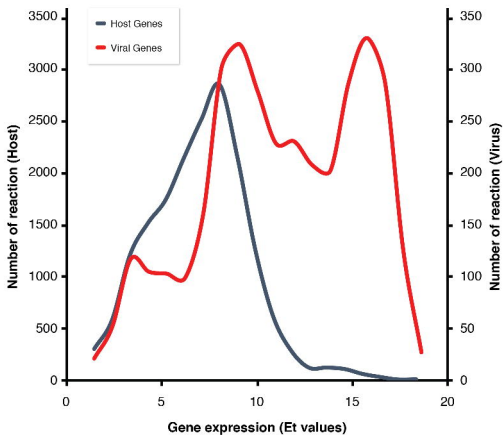

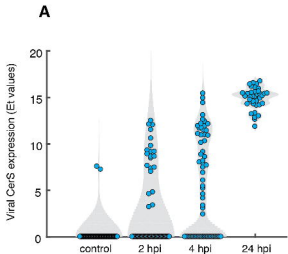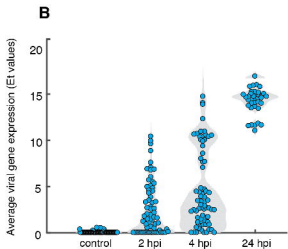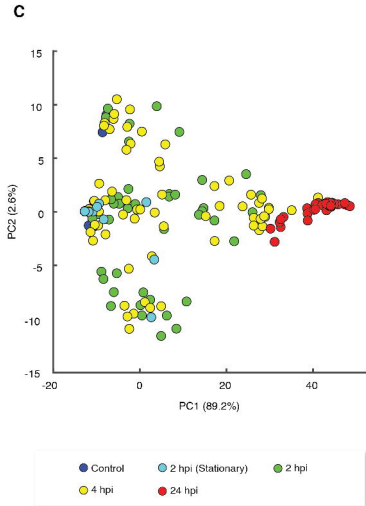

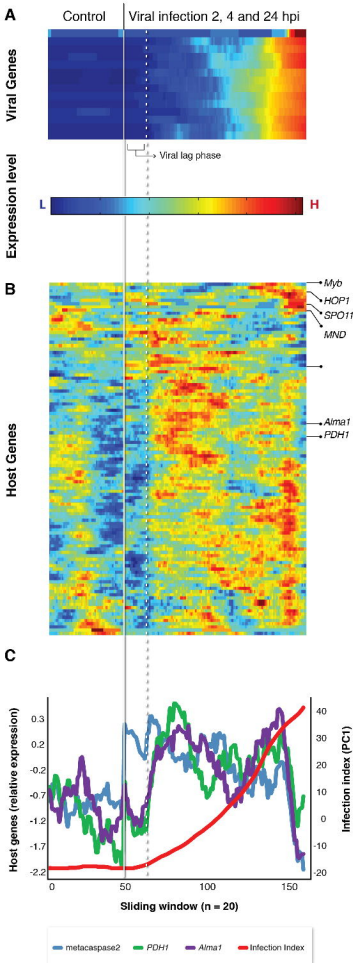

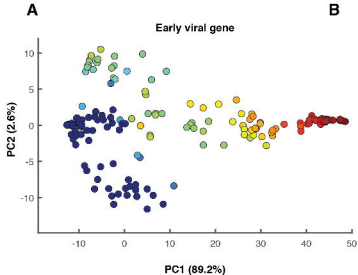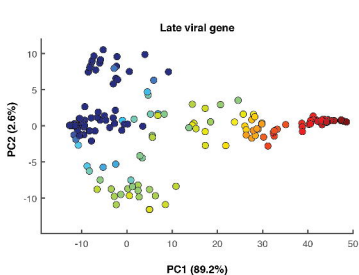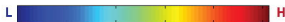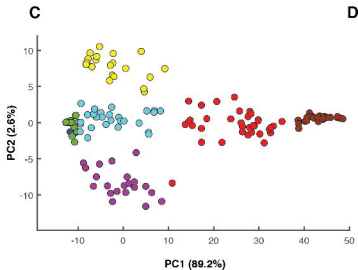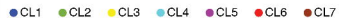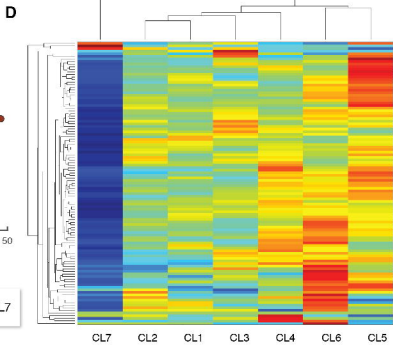

**A**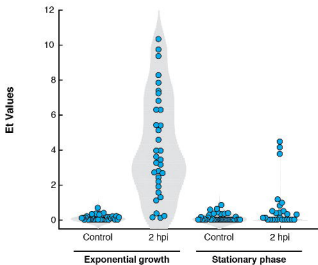**B**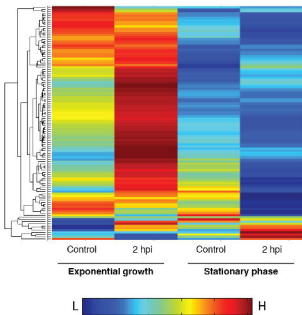

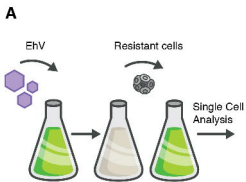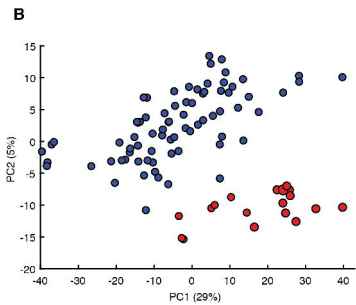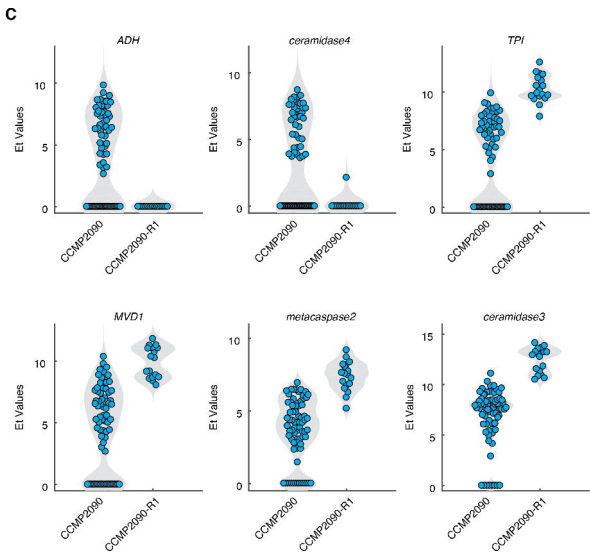

Source: http://biorxiv.org/content/10.1101/186981v2.full.pdf
